# Supplementary material for: Effects of Torcetrapib in Patients at High Risk for Coronary Events
Source: Atypon-hosted journal article supplement (doi:10.1056/nejmoa0706628), 2007-11-05
Supplement: nejmoa0706628-sa1.pdf [file nejmoa0706628-sa1.pdf]

## Supplementary Appendix

This appendix has been provided by the authors to give readers additional information about their work.

Supplement to: Barter PJ, Caulfield M, Eriksson M, et al. Effects of torcetrapib in patients at high risk for coronary events. *N Engl J Med* 2007;357:2109-22. DOI: 10.1056/NEJMoa0706628.

| <b>Web Table 1.</b>                  |                                |                                                 |
|--------------------------------------|--------------------------------|-------------------------------------------------|
| <b>Cancer deaths by primary site</b> |                                |                                                 |
| <b>Primary Site</b>                  | <b>Atorvastatin<br/>(n=14)</b> | <b>Torcetrapib/<br/>Atorvastatin<br/>(n=24)</b> |
|                                      | <b>n (%)</b>                   | <b>n (%)</b>                                    |
| Brain                                | 0 (0)                          | 1 (4)                                           |
| Lung                                 | 9 (64)                         | 8 (33)                                          |
| Breast                               | 0 (0)                          | 1 (4)                                           |
| Melanoma                             | 0 (0)                          | 1 (4)                                           |
| Upper GI                             | 1 (7)                          | 2 (8)                                           |
| Pancreatic                           | 2 (14)                         | 5 (21)                                          |
| Colorectal                           | 1 (7)                          | 1 (4)                                           |
| Bladder                              | 0 (0)                          | 1 (4)                                           |
| Leukemia                             | 0 (0)                          | 2 (8)                                           |
| Lymphoma                             | 0 (0)                          | 1 (4)                                           |
| Multiple myeloma                     | 1 (7)                          | 1 (4)                                           |

**Web Table 2.****Most common reported serious adverse events by preferred term\***

| Serious Adverse Event                 | Atorvastatin<br>(n=7,534) | Torcetrapib/<br>Atorvastatin<br>(n=7,533) | p-value |
|---------------------------------------|---------------------------|-------------------------------------------|---------|
|                                       | n (%)                     | n (%)                                     |         |
| Chest Pain                            | 126 (1.67)                | 165 (2.19)                                | 0.02    |
| Atrial Fibrillation                   | 48 (0.64)                 | 41 (0.54)                                 | 0.46    |
| Osteoarthritis                        | 39 (0.52)                 | 48 (0.64)                                 | 0.33    |
| Angina Unstable                       | 36 (0.48)                 | 48 (0.64)                                 | 0.19    |
| Pneumonia                             | 34 (0.45)                 | 46 (0.61)                                 | 0.18    |
| Angina Pectoris                       | 33 (0.44)                 | 42 (0.56)                                 | 0.30    |
| Fall                                  | 36 (0.48)                 | 38 (0.50)                                 | 0.82    |
| Prostate Cancer                       | 30 (0.40)                 | 28 (0.37)                                 | 0.79    |
| Chronic Obstructive Pulmonary Disease | 25 (0.33)                 | 27 (0.36)                                 | 0.78    |
| Non-cardiac Chest Pain                | 27 (0.36)                 | 22 (0.29)                                 | 0.48    |
| Syncope                               | 22 (0.29)                 | 26 (0.35)                                 | 0.56    |
| Congestive Cardiac Failure            | 16 (0.21)                 | 24 (0.32)                                 | 0.21    |
| Gastrointestinal Haemorrhage          | 15 (0.20)                 | 25 (0.33)                                 | 0.11    |
| Anaemia                               | 14 (0.19)                 | 25 (0.33)                                 | 0.08    |
| Cellulitis                            | 17 (0.23)                 | 22 (0.29)                                 | 0.42    |
| Abdominal Pain                        | 18 (0.24)                 | 11 (0.15)                                 | 0.19    |
| Cholelithiasis                        | 17 (0.23)                 | 12 (0.16)                                 | 0.35    |
| Dyspnoea                              | 16 (0.21)                 | 13 (0.17)                                 | 0.58    |
| Urinary Tract Infection               | 14 (0.19)                 | 13 (0.17)                                 | 0.85    |

Serious

adverse events are treatment emergent with onset following randomization and prior to December 2, 2006. Preferred terms based on MEDRA version 8.0. Adjudicated endpoint events were not to be reported as SAEs and are not included in these counts.

| <b>Web Table 3.</b>                                                    |                                   |                                                    |                |
|------------------------------------------------------------------------|-----------------------------------|----------------------------------------------------|----------------|
| <b>Reported serious adverse events by organ system classification*</b> |                                   |                                                    |                |
| <b>Organ System</b>                                                    | <b>Atorvastatin<br/>(n=7,534)</b> | <b>Torcetrapib/<br/>Atorvastatin<br/>(n=7,533)</b> | <b>p-value</b> |
|                                                                        | <b>n (%)</b>                      | <b>n (%)</b>                                       |                |
| Blood / Lymphatic                                                      | 23 (0.31)                         | 34 (0.45)                                          | 0.14           |
| Cardiac                                                                | 232 (3.08)                        | 241 (3.20)                                         | 0.67           |
| Congenital / Familial / Genetic                                        | 4 (0.05)                          | 1 (0.01)                                           | 0.18           |
| Ear / Labyrinth                                                        | 9 (0.12)                          | 6 (0.08)                                           | 0.44           |
| Endocrine                                                              | 2 (0.03)                          | 3 (0.04)                                           | 0.66           |
| Eye                                                                    | 6 (0.08)                          | 12 (0.16)                                          | 0.16           |
| Gastrointestinal                                                       | 151 (2.00)                        | 169 (2.24)                                         | 0.31           |
| General / Administration Site                                          | 176 (2.34)                        | 216 (2.87)                                         | 0.04           |
| Hepatobiliary                                                          | 42 (0.56)                         | 40 (0.53)                                          | 0.83           |
| Immune                                                                 | 1 (0.01)                          | 5 (0.07)                                           | 0.10           |
| Infections / Infestations                                              | 177 (2.35)                        | 182 (2.42)                                         | 0.79           |
| Injury / Poisoning / Procedural                                        | 89 (1.18)                         | 98 (1.30)                                          | 0.51           |
| Investigations                                                         | 20 (0.27)                         | 17 (0.23)                                          | 0.62           |
| Metabolism / Nutrition                                                 | 34 (0.45)                         | 43 (0.57)                                          | 0.30           |
| Musculoskeletal / Connective Tissue                                    | 121 (1.61)                        | 127 (1.69)                                         | 0.70           |
| Neoplasms, All                                                         | 136 (1.81)                        | 128 (1.70)                                         | 0.62           |
| Nervous System                                                         | 91 (1.21)                         | 125 (1.66)                                         | 0.02           |
| Psychiatric                                                            | 17 (0.23)                         | 20 (0.27)                                          | 0.62           |
| Renal / Urinary                                                        | 54 (0.72)                         | 58 (0.77)                                          | 0.70           |
| Reproductive System / Breast                                           | 18 (0.24)                         | 27 (0.36)                                          | 0.18           |
| Respiratory / Thoracic / Mediastinal                                   | 97 (1.29)                         | 101 (1.34)                                         | 0.77           |
| Skin / Subcutaneous Tissue                                             | 9 (0.12)                          | 12 (0.16)                                          | 0.51           |
| Surgical / Medical Procedure                                           | 13 (0.17)                         | 16 (0.21)                                          | 0.58           |
| Vascular                                                               | 74 (0.98)                         | 71 (0.94)                                          | 0.80           |

Serious adverse events are treatment emergent with onset following randomization and prior to December 2, 2006. Organ system classification based on MEDRA version 8.0. Adjudicated endpoint events were not to be reported as SAEs and are not included in these counts.

### Web Figure 1

Observed on-trial lipid levels by treatment group. High density lipoprotein= HDL, low-density lipoprotein=LDL, triglycerides=TG, C=cholesterol. Values are mean levels except for TG (median). Sample size ranges from 7,502-7,520 at baseline to 6,935-7,033 at month 12. Web Figure 1a is atorvastatin, Web Figure 1b is torcetrapib/atorvastatin.

### Web Figure 1a

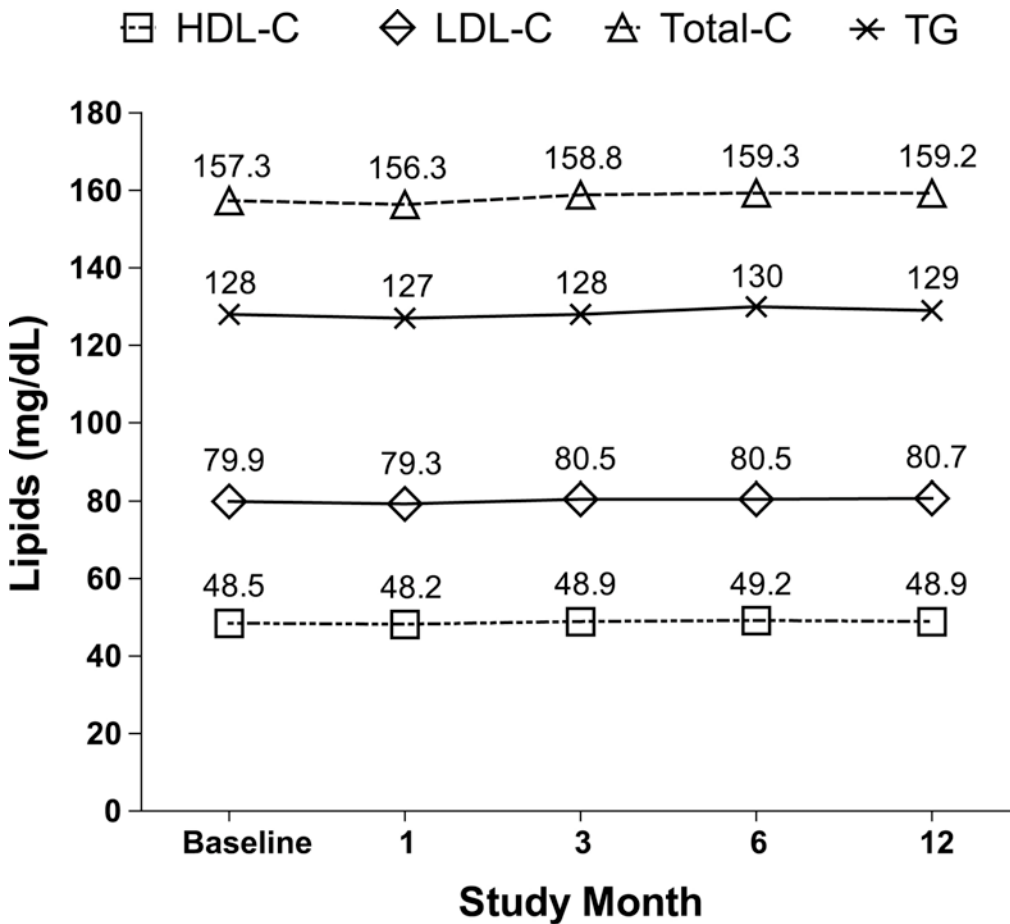

Web Figure 1b

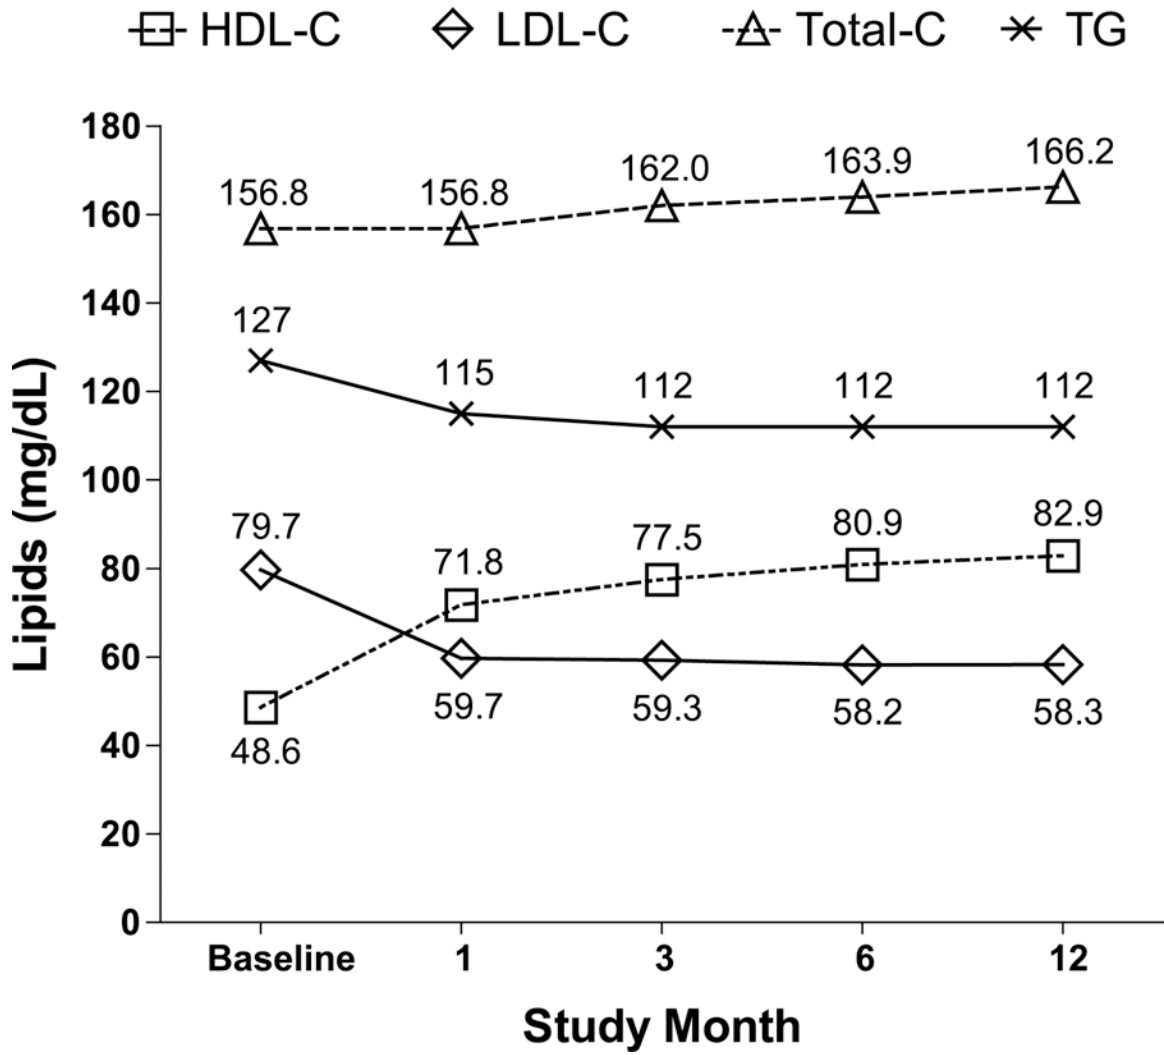

### Web Figure 2

Observed blood pressure (BP) and electrolyte abnormalities by treatment group. Systolic=SBP, Diastolic=DBP; values are mean levels. Sodium=Na<sup>+</sup>, potassium=K<sup>+</sup>, chloride=Cl and bicarbonate-HCO<sub>3</sub><sup>-</sup>; values represent the proportion greater than the upper limit of the reference range for Na<sup>+</sup> (>146 mEq/L) and HCO<sub>3</sub><sup>-</sup> (>33.3 mEq/L) and below the lower limit of the reference range for K<sup>+</sup> (<3.5mEq/L) and chloride (<97 mEq/L). Sample size ranges from 7,483-7,554 at baseline to 6,936-7,056 at month 12. Web Figure 2a is atorvastatin, Web Figure 2b is torcetrapib/atorvastatin. Blood samples were not collected at month 9.

### Web Figure 2a

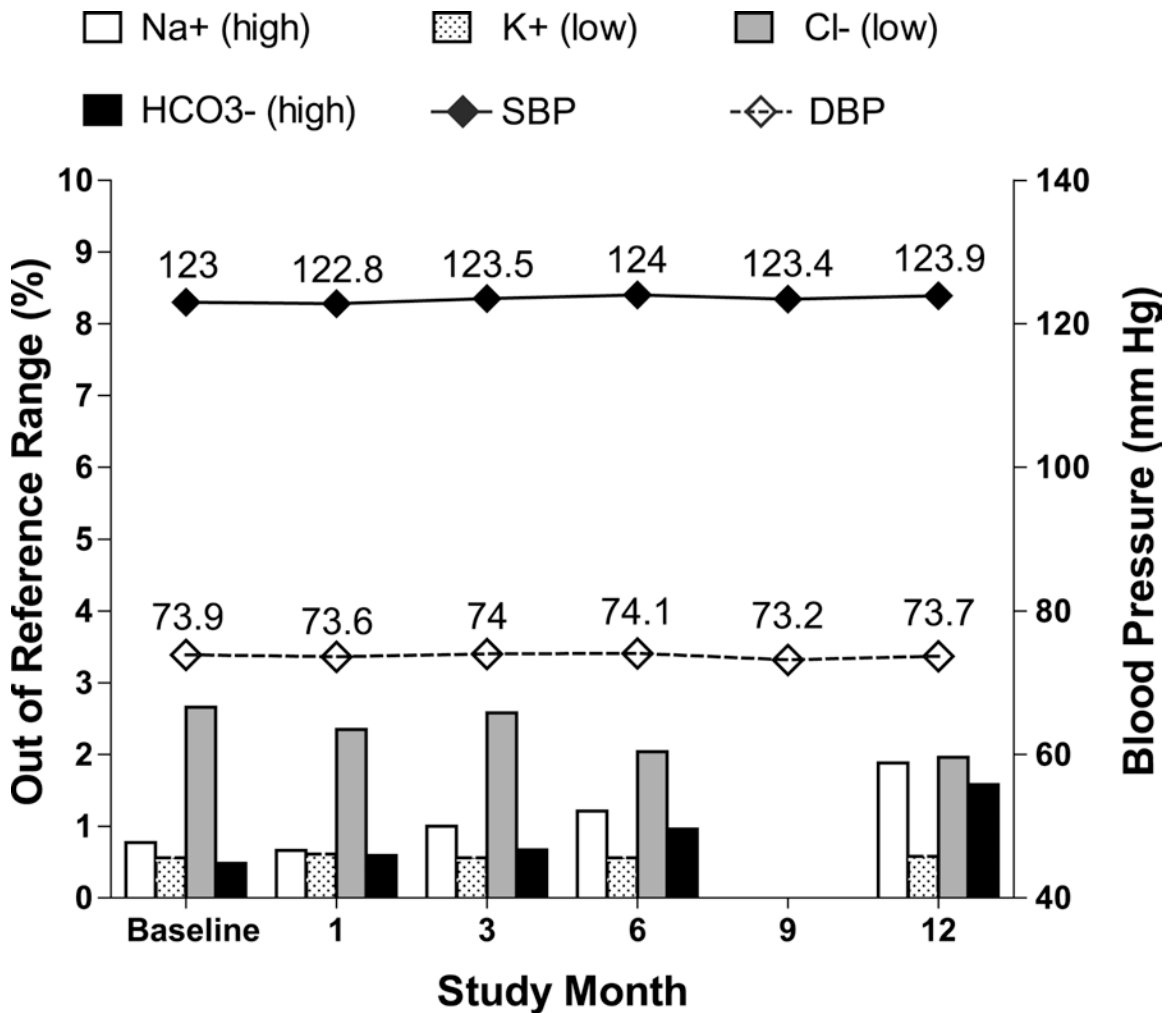

Web Figure 2b

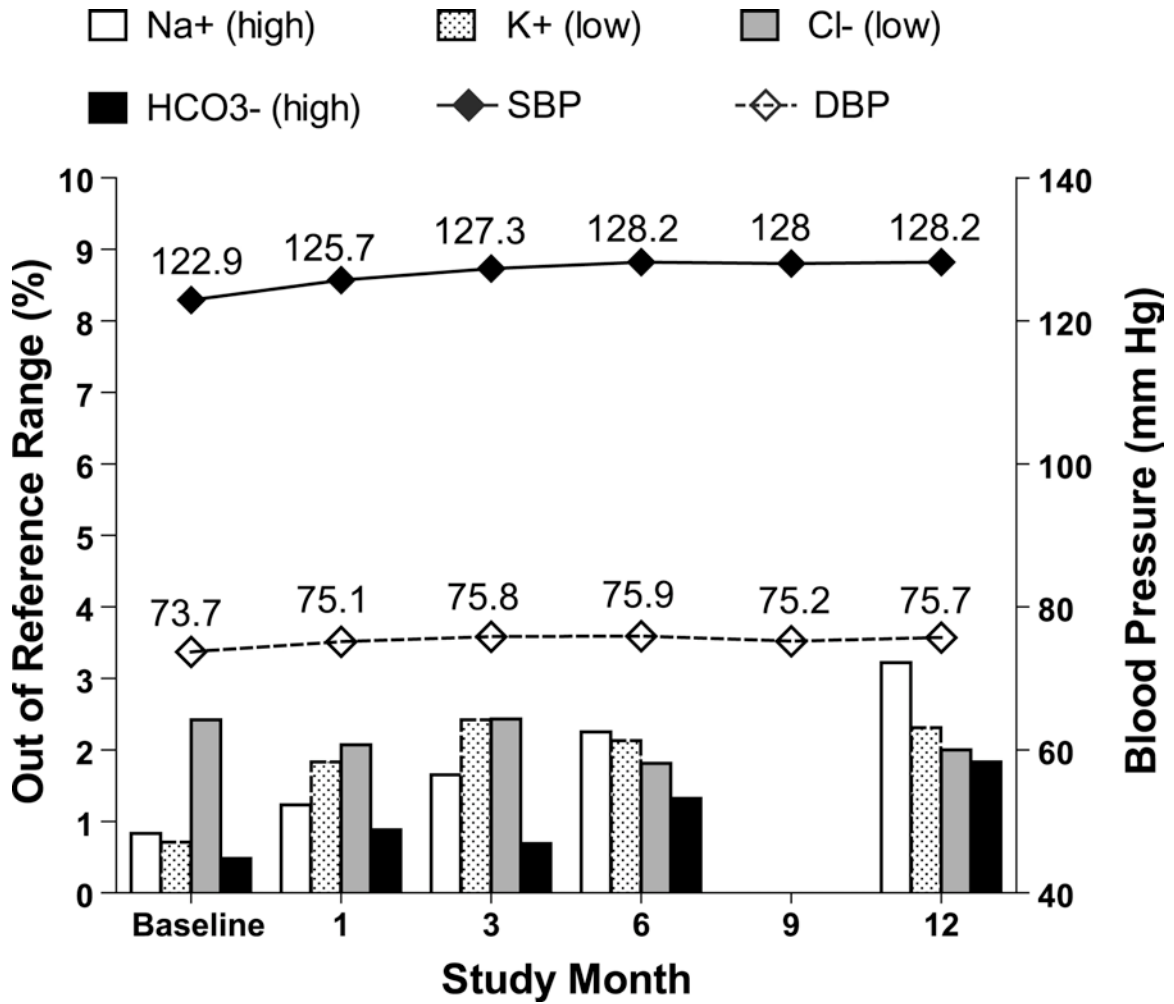

**In addition to the authors, the following investigators participated in this study:**

**Australia:**

Con Nicholas Aroney-Prince Charles Hospital, Denis Crimmins-Central Coast Neurosciences Research, Michael C D'Emden-Royal Brisbane Hospital, Anthony Michael Dart-Alfred Hospital Heart Centre, Timothy Davis-Fremantle Hospital, Gregory Ronald Fulcher-Royal North Shore Hospital, John D Horowitz-The Queen Elizabeth Hospital, Laurie Howes-Gold Coast Hospital, George Jerums-Repatriation Hospital, Len Kritharides-Concord Hospital, Henry Krum-Alfred Hospital, Geoff Lane-Cardiology Research-Fremantle Hospital, Leo James Mahar-Royal Adelaide Hospital, Thomas Hugh Marwick-Princess Alexandra Hospital, Robert Bartram Minson-Flinders Medical Centre, Geoffrey Charles Nicholson-The Geelong Hospital, Richard Charles O'Brien-Monash Medical Centre, David O'Neal-St Vincents Hospital, Dwain Alan Owensby-Wollongong Hospital, Peter Purnell-Joondalup Health Campus, Leon Abraham Simons-St. Vincents Hospital, Bhuwan Singh-Launceston General Hospital, David Sullivan-Royal Prince Alfred Hospital, Peter Lindsay Thompson-Heart Research Institute/Sir Charles Gairdner Hospital, Gerald Watts-Royal Perth Hospital

**Canada:**

Richard Baillot-Hopital Laval, Jacques Bedard-London Clinical Research, Andre Belanger-Centre De Recherche Clinique De Laval, Christian Constance-Hopital Maisonneuve-Rosemont, Paul DeYoung-McConnell Medical Centre, Claude Gagne-Clinic of Lipid Disease of Quebec Inc, Rafik Habib-Centre Cardiovasculaire De Laval, Andrew Ignaszewski-St. Paul's Hospital and University of British Columbia, Lawrence Leiter-St. Michael's Hospital, Patrick T. S. Ma-The Heart Health Institute, Steven Miner-Newmarket Cardiology, David Mymin- Health Sciences Centre, Reginald Nadeau-Hopital Du Sacre-Coeur De Montreal, Michael J. O'Mahony-The London Road Diagnostic Centre, Joseph Ricci-Scarborough Cardiology Research, Mark Sherman-Royal Victoria Hospital, Bruce Sussex-Health Sciences Centre, Jean-Claude Tardif-Institut de Cardiologie de Montreal, Lawrence Tittle-QE II Health Sciences Center, Mouhieddin Traboulsi-Foothills Medical Centre/University of Calgary, Vincent C. Woo-Diabetes Research Group

**Netherlands:**

Irmaina Agous-Andromed Leiden, Dick C.G. Basart-Vasculair Onderzoeks Centrum Hoorn, Frits W.H.M. Bär-Academisch Ziekenhuis Maastricht, Marcel C.G. Daniels-Jeroen Bosch Ziekenhuis, Lena De Schipper-Andromed Zoetermeer, Peter H.J.M. Dunselman-Amphia Ziekenhuis, Michael P. Freericks-Ikazia Ziekenhuis, Diederick E. Grobbee-Universitair Medisch Centrum Utrecht, Julius Center, Björn E. Groenemeijer-Gelre Ziekenhuis, Donald P. Hertzberger-Canisius-Wilhelmina Ziekenhuis, Jan J.C. Jonker-Andro Medical Research B.V., J. Wouter Jukema-Leids Universitair Medisch Centrum, Yelka A. Koster - Andromed Oost, Johannes A Kragten- Atrium Ziekenhuis, AnHo Liem-Oosterschelde Ziekenhuis, Joan G. Meeder-VieCuri Medisch Centrum voor Noord-Limburg, Herman R. Michels-Catharina Ziekenhuis, Peter R Nierop-Sint Franciscus Gasthuis, Cor Schop-IJsselland Ziekenhuis, Anton F.H. Stalenhoef-Universitair Medisch Centrum St. Radboud, Jeroen Tiebesl-Andromed Noord, Mieke D. Trip-Academisch Medisch Centrum, Marc

E.R.M. van Daele-Maasland Ziekenhuis, Maarten W.J. van Hessen-Groene Hart Ziekenhuis, Loet H.J. van Kempen-Ziekenhuis Velp, Adrie J.A.M. Withagen-Reinier de Graaf Gasthuis

**Spain:**

Pedro Aranda-Hospital Carlos Haya, José Ramón Berrazueta-Hospital Universitario Marques de Valdecilla, Lourdes Cabrera Garcia-Clínica Puerta de Hierro, Carlos Calvo-Hospital Clínico, Universitario de Santiago, Jose Antonio Casanovas-Hospital Miguel Servet, Eduardo deTeresa-Hospital Clinico Virgen de la Victoria, Alfonso Del Rio-Hospital Clinico Lozano Blesa, Arturo Fernandez- Cruz-Hospital Clínico San Carlos, Roman Freixa-Hospital Dos de Mayo de la Cruz Roja, Juan Garcia Puig-Hospital Universitario La Paz, Candido Martin Luengo-Hospital Universitario de Salamanca, Francisco S Martinez Debén-Hospital Arquitecto Marcide, Ramon Martos-Hospital Torrecardenas, Jose Maria Mostaza-Hospital Carlos III, Javier Nieto-Hospital Ntra Señora de Alarcos, Josefina Olivan-Hospital Virgen de la Macarena, José María Pascual-Hospital De Sagunto, Carlos Perez-Munoz-Hospital de Jerez, Ramon Querejeta-Hospital de Donosti (Aranzazu), Francisco Ridocci- Consorci Hospital Universitario Gral. de Valencia, Jose Antonio-Romero Hinojosa-Hospital Virgen de la Nieves, Emillio Ros-Hospital Clinic i Provincial, Rafael Rubio-Hospital Gregorio Marañón, Luis Miguel Ruilope-Hospital Universitario 12 de Octubre, Leandro Saenz Cusi-Hospital Mutua de Tarrasa, Javier Sobrino-Hospital L'Esperit Sant

**Sweden:**

Stefan Agewell-Karolinska Universitetssjukhuset-Huddinge, Faris Al-Khalili-Danderyds Sjukhus, Eva Basilier-Mälarsjukhuset, Mikael Dellborg-SU/Östra, Ole Sander Hansen-Universitetsjukhuset MAS, Jan-Håkan Jansson-Skellefteå Lasarett, Steen Jensen-Medicinkliniken, Lars-Erik Larsson-Västerviks Sjukhus, Bertil Lindahl-Akademiska Sjukhuset, Thomas Mooe-Östersunds Sjukhus, Peter Nicol-Köpings Lasarett, Ove Nilsson-Vrinnevisjukhuset, Hans Öhlin-Universitetssjukhuset, Jan Östergren-Karolinska Sjukhuset, Kim Pedersen-Hjärtmottagningen, Birgitta Persson-SU/Möln dal Sjukhus, Bo Polhem-Praktikertjänst, Vårdcentralen, Ulf Rosenqvist-Berzelius Clinical Research Center AB, Bassem Samad-Stockholm Heart Center, Gerth Stehn-Göingekliniken, Leif Svensson-Södersjukhuset, Hans Tygesen-Borås Lasarett, Peter Vasko-Växjö Centrallasarett, Mats Weström-Örnässets Vårdcentral, Olle Wiklund-Sahlgrenska Universitetssjukhuset

**United Kingdom:**

Anthony Barnett-Heartlands Hospital, Mark J. Caulfield-Queen Mary School of Medicine and Dentistry, Christopher Davidson-The Royal Sussex County Hospital, Colin Dayan-Bristol Royal Infirmary Clinical Investigation Unit, Barrie Miles Fisher-Glasgow Royal Infirmary, Michael Fisher-Royal Liverpool Hospital, Robert Gregory-Leicester General Hospital, John Harvey-Wrexham Maelor Hospital, Honer H. Kadr-Queens Hospital, David Kerr-Royal Bournemouth Hospital, Graham Peter Leese-Ninewells Hospital and Medical School, Greg J. Lip-City Hospital, Andrew F. MacLeod-Royal Shrewsbury Hospital South, Keith Oldroyd-Cardiology Western Infirmary, William J. Penny-University Hospital of Wales, Ian Purcell-Freeman Hospital, Najmi Qureshi-Warwick Hospital, John Reckless-Royal United Hospital North, Alan Rees-University Hospital of Wales, Roxy Senior-Northwick Park Hospital, Carl Shakespeare-Queen Elizabeth Hospital, John N. Townend-Queen Elizabeth Hospital, Neal Uren-The Royal Infirmary of Edinburgh, John Webster-Aberdeen Royal Infirmary, Yuk Ki Wong-St. Richard's Hospital

**United States:**

Sean Ameli-Nevada Cardiology Associates, Jay K. Amin-Clearwater Cardiovascular & Interventional Consultants, Riyaz J. Bashir-University of Toledo, Harold Bays-L-Marc Research Center, Jerry D. Becker-The Heart Group, Richard Bergstrom-Portland Diabetes & Endocrinology Center, PC, Seth D. Bilazarian-Pentucket Medical Associates, Vera Bittner-The University of Alabama at Birmingham, Michael A. Blazing-Duke University Medical Center, Eliot A. Brinton-University of Utah, Jeffrey Carstens-Nebraska Heart Institute, William Cefalu-Pennington Biomedical Research Center, Richard A. Chazal-The Heart Group, PL, Lambert Chee-Diablo Clinical Research, Inc., Michael C. Collins-Clinical Research Consultants, Inc., Fred H. Cucher-Phoenix Heart, PLLC, Patrick Daley-Parkview Research Center, James DeLemos-University of Texas Southwestern Medical Center, Anthony DeMaria-University of California San Diego Medical Center, Vikas Desai-Charles River Medical Associates, Joseph Drozda-Mercy Health Research, Daniel Duprez-University of Minnesota, Cara East-Clinical Cardiovascular Research Center, Gregory Eaton-Mid Ohio Heart Clinic, Inc., William J. Elliott-Rush University Medical Center, Jonathan Ellis-Compass Medical Associates, Timothy C. Fagan-Tucson Clinical Research, Raed Fahmy-FHS Research Center, Lawrence F. Feld-Horizon Clinical Research Associates, Theodore Feldman-Miami Research Associates, Zachary R. Freedman-Rochester General Hospital, Mark D. Gelernt-Cardiovascular Associates of the Delaware Valley, Santosh K. Gill-Fox Valley Clinical Research Center, LLC, Anne Goldberg-Washington University, David A. Goldscher-MidAtlantic Cardiovascular Associates, PA, Daniel W. Gottlieb, Ronald Graf-Cedar Research, LLC, John Guyton-Duke University Medical Center, Lillian Harstine-Trilogy, Randy B. Hartman-Heart & Vascular Center Research, Ethan J. Haskel-MidAtlantic Cardiovascular Associates, PA, David Herrington-Wake Forest University Health Sciences, Kenneth Hershon-North Shore Diabetes & Endocrine Associates, William Herzog, Jr.-HPV Heart, Alan S. Hoffman, D. Gregory Hopkins-Northern California Medical Associates, Barry S. Horowitz-Metabolic Research Institute, Inc., William James Howard-MedStar Research Institute, Victor N. Howard-VNH Heart Center, Timothy L. Jackson-TriState Medical Group, Inc., Denise Janosik-St. Louis University School of Medicine, Scott Jerome-MidAtlantic Cardiovascular Associates, PA, Peter W. Kakavas-Heart Care Research Foundation, Dean Karalis-Cardiology Consultants of Philadelphia, H.B. Karunaratne-Florida Institute at Florida Hospital, Leonard Keilson-Maine Center for Lipids & Cardiovascular Health, Dean Kereiakes-The Lindner Clinical Trial Center, Howard R. Knapp-Deaconess Billings Clinic Research Center, Michael J. Koren-Jacksonville Center for Clinical Research, John B. Kostis-University of Medicine & Dentistry of New Jersey-Robert Wood Johnson, Jeffrey H. Kramer-Cardiovascular Associates of the Delaware Valley, William Kraus-Duke Center for Living, Frederick E. Kuhn-MidAtlantic Cardiovascular Associates, PA, Jay Lang-MidAtlantic Cardiovascular Associates, PA, Gabriel P. Lasala-TCA Research, Joseph Lash-Cardiovascular Associates, Philip Levin-MODEL Clinical Research, Sandra Lewis-Legacy Research, MacRae Linton-Vanderbilt University Medical Center, Peter F. Linz-Naval Medical Center San Diego, Marc Litt-Jacksonville Heart Center, Barry Lubin-Hampton Roads Center for Clinical Research, Inc., Gregory Macina-Cardiovascular Medical Associates, Robert D. Matheney-Heart Clinic of Louisiana, Mary McGowan-Concord Hospital Cholesterol Treatment Center, Patrick McGuinn-North Ohio Research, Inc., James McKenney-National Clinical Research, Inc., John Charles Merillat-Valley Heart Associates

Medical Group, Inc., Jerry L. Miller-Holston Medical Group, Michael Miller-University of Maryland Medical Center, Sandip Mukherjee-Cardiology Associates of New Haven, Joel Neutel-Orange County Research Center, Paul Norwood-University of California San Francisco, Gregory E. Peterson-Diagnostic & Critical Care Medicine, Daniel F. Phillips-Northwest Florida Heart Group, David A. Podlecki-Longmont Medical Research Network, Stephen Pollock-MidAtlantic Cardiovascular Associates, PA, James K. Porterfield-MidAtlantic Cardiovascular Associates, PA, John Pullman-Mercury Street Medical Group, Jeffrey Quartner-MidAtlantic Cardiovascular Associates, PA, Thomas Raya-St. Paul Heart Clinic, Russell Reeves-CardioVascular Associates of North Alabama, PC, David G. Robertson-Atlanta Diabetes Association, Jennifer G. Robinson-University of Iowa, Michael Rocco-Cleveland Clinic Foundation, Eli M. Roth-Sterling Research Group, Ltd., Jorge Saucedo-University of Oklahoma Health Sciences Center, David J. Schneider-Fletcher Allen Health Care, Christopher Simek-Waston Clinic, LLP, Roldolfo P. Sotolongo-Southeast Texas Cardiology Associates II, LLP, Paul D. Thompson-Hartford Hospital, Jonathan G. Thorne-Remington-Davis Inc. Clinical Research, Andrew T. Torkelson-Dartmouth-Hitchcock Medical Center, Nampalli Vijay-Aurora Denver Cardiology Associates, Timothy O. Wahl-IMA Research Center, Karol E. Watson-University of California Los Angeles School of Medicine, Edwin J. Whitney-Heart & Vascular Institute of Texas, William J. Wickemeyer-Iowa Heart Center, David Wohns-Spectrum Health Care Research Department, Scott Yates-North Texas Medical Research, Laurence Yellen-Cardiology Associates Medical Group
